# Supplementary material
Source: MDPI journal article supplement (https://www.mdpi.com/2075-163X/13/6/821)
Supplement: s1 [file s1]

Table S1. Major elements, trace and rare earth element data.

| Sample no.                         | NP01-4  | NP02-1 | NP03-1 | NP03-6 | NP05-2 | NP12-7       | NP13-1 | NP16-3 | NP17-2 | NP17-8 | NP21-3       | NP22-2 | NP25-6 | NP26-1 | NP28-6 |
|------------------------------------|---------|--------|--------|--------|--------|--------------|--------|--------|--------|--------|--------------|--------|--------|--------|--------|
| Lithology                          | Diorite |        |        |        |        | Monzodiorite |        |        |        |        | Granodiorite |        |        |        |        |
| SiO <sub>2</sub>                   | 63.03   | 62.83  | 61.96  | 60.72  | 61.67  | 56.43        | 56.26  | 57.60  | 57.59  | 56.41  | 65.95        | 65.60  | 64.57  | 63.22  | 64.02  |
| K <sub>2</sub> O                   | 1.58    | 1.65   | 1.54   | 1.78   | 1.61   | 2.01         | 2.17   | 1.95   | 1.75   | 2.47   | 1.53         | 1.84   | 1.75   | 1.64   | 1.81   |
| Na <sub>2</sub> O                  | 3.82    | 3.64   | 3.86   | 4.06   | 3.84   | 4.10         | 4.51   | 3.71   | 3.85   | 4.35   | 3.54         | 3.34   | 3.83   | 3.68   | 3.74   |
| CaO                                | 5.88    | 6.02   | 6.54   | 6.10   | 6.39   | 7.36         | 7.06   | 6.66   | 6.52   | 7.12   | 5.51         | 5.75   | 6.05   | 6.07   | 5.98   |
| MgO                                | 1.42    | 1.61   | 1.74   | 1.68   | 2.16   | 2.36         | 2.63   | 2.21   | 2.33   | 2.48   | 1.96         | 1.58   | 1.28   | 1.68   | 1.76   |
| Al <sub>2</sub> O <sub>3</sub>     | 17.51   | 16.84  | 17.39  | 18.19  | 16.74  | 18.58        | 18.87  | 17.77  | 17.62  | 18.47  | 16.15        | 15.97  | 16.82  | 16.77  | 16.57  |
| TFe <sub>2</sub> O <sub>3</sub>    | 3.84    | 3.98   | 4.51   | 4.55   | 5.07   | 5.62         | 5.53   | 5.87   | 6.49   | 5.29   | 3.92         | 4.03   | 3.45   | 3.95   | 4.38   |
| MnO                                | 0.11    | 0.10   | 0.12   | 0.13   | 0.13   | 0.17         | 0.16   | 0.17   | 0.15   | 0.17   | 0.08         | 0.06   | 0.09   | 0.11   | 0.12   |
| TiO <sub>2</sub>                   | 0.45    | 0.45   | 0.48   | 0.51   | 0.48   | 0.62         | 0.74   | 0.60   | 0.53   | 0.65   | 0.44         | 0.41   | 0.45   | 0.40   | 0.53   |
| P <sub>2</sub> O <sub>5</sub>      | 0.14    | 0.17   | 0.16   | 0.23   | 0.20   | 0.30         | 0.36   | 0.28   | 0.27   | 0.32   | 0.14         | 0.14   | 0.15   | 0.18   | 0.16   |
| LOI                                | 1.76    | 1.97   | 1.22   | 1.31   | 1.49   | 1.84         | 0.79   | 2.37   | 2.14   | 1.81   | 0.52         | 1.17   | 1.20   | 1.95   | 0.82   |
| Total                              | 99.53   | 99.25  | 99.51  | 99.27  | 99.78  | 99.38        | 99.06  | 99.17  | 99.24  | 99.53  | 99.73        | 99.89  | 99.63  | 99.64  | 99.89  |
| Na <sub>2</sub> O/K <sub>2</sub> O | 2.42    | 2.21   | 2.51   | 2.28   | 2.39   | 2.04         | 1.99   | 1.90   | 2.20   | 1.75   | 2.31         | 1.82   | 2.19   | 2.24   | 2.07   |
| σ                                  | 1.46    | 1.41   | 1.54   | 1.93   | 1.59   | 3.05         | 3.73   | 2.36   | 2.15   | 3.63   | 1.12         | 1.19   | 1.44   | 1.40   | 1.47   |
| Mg#                                | 42      | 45     | 43     | 42     | 46     | 45           | 49     | 43     | 42     | 48     | 50           | 44     | 42     | 46     | 44     |
| Be                                 | 2.00    | 1.71   | 2.17   | 3.02   | 2.82   | 2.48         | 2.73   | 2.51   | 1.65   | 2.60   | 2.03         | 1.95   | 1.80   | 1.98   | 2.27   |
| Li                                 | 9.51    | 9.51   | 24.12  | 30.21  | 30.37  | 27.92        | 21.35  | 26.75  | 21.18  | 12.07  | 8.20         | 6.14   | 8.56   | 14.07  | 32.34  |
| V                                  | 68.68   | 69.22  | 70.89  | 103.76 | 103.41 | 139.95       | 158.36 | 169.83 | 206.00 | 109.32 | 62.54        | 71.07  | 66.78  | 61.62  | 81.32  |
| Cr                                 | 27.45   | 33.07  | 26.43  | 47.83  | 46.42  | 33.11        | 39.59  | 36.81  | 34.99  | 35.20  | 34.16        | 24.50  | 30.45  | 25.83  | 30.60  |
| Co                                 | 6.94    | 5.50   | 7.16   | 11.59  | 10.46  | 12.70        | 15.72  | 18.38  | 20.30  | 11.44  | 6.32         | 3.98   | 4.79   | 9.73   | 8.02   |
| Ni                                 | 4.92    | 4.23   | 5.56   | 9.69   | 9.81   | 10.27        | 10.44  | 9.97   | 9.61   | 8.57   | 6.26         | 3.76   | 5.54   | 4.03   | 7.51   |
| Cu                                 | 3.52    | 4.85   | 6.91   | 33.87  | 26.63  | 49.29        | 37.86  | 67.48  | 32.12  | 23.67  | 6.21         | 5.74   | 47.07  | 5.25   | 4.88   |
| Zn                                 | 33.41   | 14.90  | 25.78  | 48.63  | 41.63  | 52.03        | 59.15  | 64.06  | 61.86  | 42.60  | 25.82        | 15.26  | 16.11  | 16.36  | 36.64  |
| Ga                                 | 17.66   | 17.26  | 18.59  | 19.97  | 19.60  | 20.32        | 21.04  | 21.26  | 20.17  | 19.88  | 17.53        | 16.74  | 17.33  | 17.46  | 18.93  |
| Rb                                 | 149.62  | 207.17 | 131.17 | 157.36 | 146.86 | 133.91       | 92.07  | 89.89  | 94.70  | 142.60 | 159.21       | 174.69 | 159.57 | 197.95 | 158.01 |

|    |        |        |        |        |        |        |        |        |        |        |        |        |        |        |        |
|----|--------|--------|--------|--------|--------|--------|--------|--------|--------|--------|--------|--------|--------|--------|--------|
| Sr | 750.04 | 663.73 | 732.75 | 663.18 | 656.55 | 774.32 | 753.69 | 918.33 | 823.61 | 744.50 | 675.17 | 590.27 | 700.49 | 590.66 | 648.55 |
| Zr | 76.43  | 69.15  | 102.08 | 103.22 | 121.41 | 147.97 | 105.10 | 109.88 | 106.83 | 135.43 | 100.82 | 77.73  | 71.49  | 76.89  | 88.74  |
| Nb | 9.95   | 9.96   | 11.70  | 14.00  | 14.69  | 12.44  | 14.70  | 12.62  | 9.09   | 13.83  | 11.37  | 12.33  | 11.17  | 9.45   | 12.88  |
| Mo | 0.45   | 0.36   | 0.53   | 1.17   | 0.93   | 1.10   | 1.18   | 1.06   | 0.75   | 0.90   | 0.60   | 1.26   | 0.73   | 0.49   | 0.76   |
| Cd | 0.07   | 0.07   | 0.07   | 0.09   | 0.10   | 0.11   | 0.13   | 0.12   | 0.10   | 0.08   | 0.08   | 0.07   | 0.09   | 0.07   | 0.09   |
| In | 0.02   | 0.01   | 0.02   | 0.04   | 0.04   | 0.05   | 0.05   | 0.05   | 0.04   | 0.04   | 0.02   | 0.01   | 0.01   | 0.01   | 0.03   |
| Sn | 1.11   | 1.02   | 1.09   | 1.54   | 1.70   | 1.78   | 1.96   | 1.86   | 1.37   | 1.62   | 1.18   | 0.92   | 0.99   | 1.11   | 1.44   |
| Sb | 0.14   | 0.30   | 0.13   | 0.32   | 0.27   | 0.12   | 0.14   | 0.14   | 0.11   | 0.16   | 0.19   | 0.12   | 0.11   | 0.15   | 0.17   |
| Te | 0.06   | 0.04   | 0.03   | 0.04   | 0.02   | 0.03   | 0.03   | 0.04   | 0.04   | 0.06   | 0.04   | 0.05   | 0.07   | 0.05   | 0.04   |
| Cs | 2.27   | 5.17   | 2.41   | 4.68   | 5.41   | 3.66   | 1.67   | 1.75   | 3.10   | 3.90   | 2.64   | 2.58   | 2.41   | 3.22   | 2.79   |
| Ba | 765.20 | 745.61 | 741.97 | 602.87 | 546.45 | 654.19 | 418.59 | 494.73 | 604.84 | 580.16 | 613.07 | 752.00 | 833.74 | 721.54 | 610.99 |
| Hf | 2.53   | 2.41   | 3.07   | 2.97   | 3.35   | 1.98   | 2.23   | 1.98   | 1.69   | 2.74   | 3.00   | 2.56   | 2.50   | 2.78   | 2.73   |
| Ta | 0.83   | 0.86   | 0.97   | 1.20   | 1.38   | 0.93   | 1.37   | 1.05   | 0.78   | 1.18   | 0.94   | 1.01   | 0.97   | 0.77   | 0.90   |
| W  | 0.82   | 1.86   | 0.45   | 0.65   | 0.70   | 0.78   | 1.43   | 0.55   | 0.54   | 0.62   | 0.57   | 29.59  | 1.94   | 0.43   | 0.52   |
| Pb | 6.53   | 3.31   | 7.23   | 12.71  | 9.27   | 8.08   | 8.23   | 7.65   | 5.65   | 8.26   | 8.21   | 7.79   | 5.73   | 6.65   | 8.72   |
| Tl | 0.49   | 0.60   | 0.46   | 0.59   | 0.58   | 0.51   | 0.38   | 0.39   | 0.43   | 0.55   | 0.51   | 0.48   | 0.46   | 0.62   | 0.57   |
| Bi | 0.03   | 0.06   | 0.03   | 0.06   | 0.07   | 0.04   | 0.08   | 0.05   | 0.04   | 0.04   | 0.05   | 0.04   | 0.03   | 0.03   | 0.04   |
| Th | 10.53  | 8.87   | 11.09  | 17.49  | 14.27  | 9.09   | 11.39  | 8.64   | 5.78   | 18.28  | 11.48  | 9.99   | 9.70   | 16.47  | 13.59  |
| U  | 4.07   | 4.47   | 4.59   | 6.88   | 6.67   | 4.07   | 5.78   | 4.96   | 1.80   | 6.31   | 5.05   | 4.57   | 4.44   | 5.21   | 5.00   |
| La | 26.90  | 26.27  | 30.09  | 35.16  | 40.18  | 33.16  | 35.50  | 36.07  | 29.22  | 38.06  | 27.84  | 24.62  | 26.55  | 32.12  | 37.93  |
| Ce | 44.69  | 43.39  | 50.34  | 62.18  | 68.19  | 55.37  | 65.71  | 63.64  | 53.07  | 65.37  | 45.83  | 39.99  | 43.06  | 55.48  | 60.67  |
| Pr | 4.70   | 4.61   | 5.43   | 6.74   | 7.39   | 6.38   | 7.58   | 7.64   | 6.25   | 7.04   | 4.78   | 4.12   | 4.54   | 5.34   | 6.18   |
| Nd | 19.59  | 18.99  | 22.43  | 28.26  | 30.60  | 27.59  | 32.89  | 34.23  | 28.35  | 29.18  | 19.23  | 16.79  | 18.74  | 19.92  | 24.93  |
| Sm | 3.79   | 3.72   | 4.34   | 5.60   | 6.16   | 5.60   | 6.88   | 7.15   | 6.19   | 5.74   | 3.70   | 3.21   | 3.66   | 3.48   | 4.77   |
| Eu | 1.17   | 1.49   | 1.27   | 1.46   | 1.44   | 1.59   | 1.68   | 1.93   | 1.80   | 1.46   | 1.11   | 1.07   | 1.18   | 1.10   | 1.25   |
| Gd | 3.52   | 3.56   | 3.92   | 5.10   | 5.59   | 5.31   | 6.32   | 6.86   | 6.04   | 5.15   | 3.44   | 2.96   | 3.40   | 3.19   | 4.29   |
| Tb | 0.56   | 0.53   | 0.63   | 0.80   | 0.90   | 0.83   | 1.00   | 1.05   | 0.98   | 0.80   | 0.55   | 0.48   | 0.53   | 0.49   | 0.69   |
| Dy | 3.17   | 3.02   | 3.53   | 4.63   | 5.06   | 4.67   | 5.60   | 6.00   | 5.38   | 4.49   | 3.11   | 2.66   | 3.10   | 2.79   | 3.86   |

|                      |        |        |        |        |        |        |        |        |        |        |        |        |        |        |        |
|----------------------|--------|--------|--------|--------|--------|--------|--------|--------|--------|--------|--------|--------|--------|--------|--------|
| Ho                   | 0.66   | 0.64   | 0.77   | 0.97   | 1.03   | 0.97   | 1.17   | 1.22   | 1.10   | 0.93   | 0.67   | 0.60   | 0.66   | 0.61   | 0.81   |
| Er                   | 1.92   | 1.87   | 2.30   | 2.83   | 2.99   | 2.65   | 3.36   | 3.41   | 3.05   | 2.71   | 1.95   | 1.75   | 1.96   | 1.78   | 2.35   |
| Tm                   | 0.32   | 0.31   | 0.37   | 0.46   | 0.48   | 0.43   | 0.55   | 0.53   | 0.48   | 0.45   | 0.34   | 0.30   | 0.32   | 0.30   | 0.39   |
| Yb                   | 2.19   | 2.04   | 2.53   | 3.01   | 3.20   | 2.76   | 3.44   | 3.40   | 2.88   | 2.84   | 2.11   | 1.99   | 2.12   | 2.06   | 2.55   |
| Lu                   | 0.34   | 0.33   | 0.41   | 0.50   | 0.50   | 0.45   | 0.52   | 0.55   | 0.44   | 0.45   | 0.36   | 0.35   | 0.36   | 0.36   | 0.39   |
| Y                    | 18.36  | 17.70  | 20.73  | 24.80  | 27.10  | 24.62  | 29.54  | 30.34  | 27.31  | 24.36  | 18.43  | 16.63  | 18.55  | 16.30  | 21.89  |
| ΣREE                 | 113.52 | 110.79 | 128.36 | 157.69 | 173.71 | 147.77 | 172.19 | 173.69 | 145.24 | 164.68 | 115.01 | 100.89 | 110.17 | 139.02 | 151.05 |
| LREE/HREE            | 7.95   | 8.00   | 7.88   | 7.62   | 7.80   | 7.18   | 6.85   | 6.54   | 6.14   | 8.24   | 8.18   | 8.10   | 7.85   | 11.01  | 8.85   |
| δEu                  | 0.96   | 1.24   | 0.92   | 0.82   | 0.74   | 0.88   | 0.77   | 0.83   | 0.89   | 0.81   | 0.94   | 1.04   | 1.01   | 0.99   | 0.83   |
| (La/Yb) <sub>N</sub> | 8.28   | 8.69   | 8.02   | 7.89   | 8.46   | 8.11   | 6.96   | 7.16   | 6.84   | 9.04   | 8.90   | 8.33   | 8.46   | 13.80  | 10.02  |
| Sr/Y                 | 40.85  | 37.49  | 35.35  | 26.74  | 24.22  | 31.45  | 25.52  | 30.27  | 30.16  | 30.56  | 36.64  | 35.50  | 37.76  | 36.23  | 29.62  |
| (La/Sm) <sub>N</sub> | 4.46   | 4.44   | 4.36   | 3.95   | 4.10   | 3.73   | 3.25   | 3.17   | 2.97   | 4.17   | 4.73   | 4.82   | 4.56   | 7.61   | 5.00   |
| Dy/Yb                | 1.45   | 1.48   | 1.40   | 1.54   | 1.58   | 1.69   | 1.63   | 1.77   | 1.87   | 1.58   | 1.47   | 1.34   | 1.46   | 1.36   | 1.51   |
| (Gd/Yb) <sub>N</sub> | 1.30   | 1.41   | 1.25   | 1.37   | 1.41   | 1.55   | 1.48   | 1.63   | 1.69   | 1.46   | 1.32   | 1.20   | 1.30   | 1.25   | 1.36   |

Notes:  $Mg\# = 100 \times (MgO/40) / (MgO/40 + 0.8998 \times TFe_2O_3/72)$

Table S2. Zircon U-Pb isotopic Dating Results.

| Point                   | Th/U    | Isotope ratio                             |        |                                          |        |                                          |        | Age(Ma)                                   |     |                                          |    |                                          |    |
|-------------------------|---------|-------------------------------------------|--------|------------------------------------------|--------|------------------------------------------|--------|-------------------------------------------|-----|------------------------------------------|----|------------------------------------------|----|
|                         |         | $\frac{^{207}\text{Pb}}{^{206}\text{Pb}}$ | 1σ     | $\frac{^{207}\text{Pb}}{^{235}\text{U}}$ | 1σ     | $\frac{^{206}\text{Pb}}{^{238}\text{U}}$ | 1σ     | $\frac{^{207}\text{Pb}}{^{206}\text{Pb}}$ | 1σ  | $\frac{^{207}\text{Pb}}{^{235}\text{U}}$ | 1σ | $\frac{^{206}\text{Pb}}{^{238}\text{U}}$ | 1σ |
|                         |         |                                           |        |                                          |        |                                          |        |                                           |     |                                          |    |                                          |    |
| <i>Diorite</i> (NP01-2) |         |                                           |        |                                          |        |                                          |        |                                           |     |                                          |    |                                          |    |
| 01                      | 0.78265 | 0.0505                                    | 0.0008 | 0.2769                                   | 0.0041 | 0.0399                                   | 0.0003 | 217                                       | 36  | 248                                      | 3  | 252                                      | 2  |
| 02                      | 0.62930 | 0.1062                                    | 0.0105 | 0.5899                                   | 0.0577 | 0.0402                                   | 0.0009 | 1734                                      | 181 | 471                                      | 37 | 254                                      | 5  |
| 03                      | 0.58499 | 0.0734                                    | 0.0026 | 0.3936                                   | 0.0102 | 0.0389                                   | 0.0003 | 1026                                      | 70  | 337                                      | 7  | 246                                      | 2  |
| 04                      | 0.60174 | 0.1416                                    | 0.0104 | 0.8154                                   | 0.0557 | 0.0407                                   | 0.0006 | 2246                                      | 127 | 605                                      | 31 | 257                                      | 4  |
| 05                      | 0.50351 | 0.1574                                    | 0.0106 | 0.8796                                   | 0.0413 | 0.0396                                   | 0.0006 | 2428                                      | 115 | 641                                      | 22 | 250                                      | 4  |
| 06                      | 0.55767 | 0.0524                                    | 0.0012 | 0.2878                                   | 0.0065 | 0.0399                                   | 0.0003 | 301                                       | 52  | 257                                      | 5  | 252                                      | 2  |
| 07                      | 0.39487 | 0.0673                                    | 0.0011 | 0.2758                                   | 0.0045 | 0.0298                                   | 0.0003 | 848                                       | 35  | 247                                      | 4  | 189                                      | 2  |
| 08                      | 0.75832 | 0.0517                                    | 0.0012 | 0.2812                                   | 0.0076 | 0.0392                                   | 0.0003 | 274                                       | 52  | 252                                      | 6  | 248                                      | 2  |
| 09                      | 0.58579 | 0.0529                                    | 0.0009 | 0.2895                                   | 0.0055 | 0.0396                                   | 0.0003 | 324                                       | 40  | 258                                      | 4  | 250                                      | 2  |
| 10                      | 0.71542 | 0.0727                                    | 0.0026 | 0.3557                                   | 0.0120 | 0.0355                                   | 0.0003 | 1005                                      | 71  | 309                                      | 9  | 225                                      | 2  |
| 11                      | 0.59850 | 0.0975                                    | 0.0021 | 0.5382                                   | 0.0135 | 0.0398                                   | 0.0003 | 1577                                      | 41  | 437                                      | 9  | 252                                      | 2  |
| 12                      | 0.54944 | 0.0507                                    | 0.0008 | 0.2776                                   | 0.0046 | 0.0396                                   | 0.0004 | 229                                       | 36  | 249                                      | 4  | 251                                      | 3  |
| 13                      | 0.69064 | 0.0509                                    | 0.0007 | 0.2809                                   | 0.0040 | 0.0400                                   | 0.0003 | 237                                       | 33  | 251                                      | 3  | 253                                      | 2  |
| 14                      | 0.85100 | 0.0517                                    | 0.0016 | 0.2800                                   | 0.0049 | 0.0393                                   | 0.0003 | 271                                       | 70  | 251                                      | 4  | 249                                      | 2  |
| 15                      | 0.58509 | 0.0510                                    | 0.0011 | 0.2844                                   | 0.0056 | 0.0406                                   | 0.0004 | 241                                       | 49  | 254                                      | 4  | 256                                      | 3  |
| 16                      | 0.66801 | 0.0497                                    | 0.0008 | 0.2765                                   | 0.0043 | 0.0403                                   | 0.0004 | 182                                       | 36  | 248                                      | 3  | 255                                      | 2  |
| 17                      | 0.62072 | 0.0505                                    | 0.0008 | 0.2763                                   | 0.0047 | 0.0396                                   | 0.0003 | 220                                       | 38  | 248                                      | 4  | 250                                      | 2  |
| 18                      | 0.71302 | 0.1114                                    | 0.0048 | 0.6014                                   | 0.0300 | 0.0383                                   | 0.0004 | 1823                                      | 79  | 478                                      | 19 | 242                                      | 3  |
| 19                      | 0.77701 | 0.1117                                    | 0.0047 | 0.5063                                   | 0.0230 | 0.0326                                   | 0.0003 | 1828                                      | 76  | 416                                      | 16 | 207                                      | 2  |
| 20                      | 0.86289 | 0.1359                                    | 0.0046 | 0.7806                                   | 0.0352 | 0.0410                                   | 0.0005 | 2175                                      | 60  | 586                                      | 20 | 259                                      | 3  |
| 21                      | 0.74307 | 0.0512                                    | 0.0009 | 0.2832                                   | 0.0057 | 0.0401                                   | 0.0005 | 248                                       | 40  | 253                                      | 4  | 254                                      | 3  |
| 22                      | 0.54717 | 0.0527                                    | 0.0018 | 0.2572                                   | 0.0099 | 0.0354                                   | 0.0005 | 315                                       | 76  | 232                                      | 8  | 224                                      | 3  |
| 23                      | 0.61668 | 0.0529                                    | 0.0027 | 0.2822                                   | 0.0080 | 0.0386                                   | 0.0003 | 325                                       | 114 | 252                                      | 6  | 244                                      | 2  |

|                              |         |        |        |        |        |        |        |     |     |     |    |     |   |
|------------------------------|---------|--------|--------|--------|--------|--------|--------|-----|-----|-----|----|-----|---|
| 24                           | 0.90155 | 0.0527 | 0.0008 | 0.2775 | 0.0048 | 0.0381 | 0.0004 | 317 | 33  | 249 | 4  | 241 | 3 |
| 25                           | 0.68960 | 0.0540 | 0.0021 | 0.2851 | 0.0071 | 0.0382 | 0.0003 | 369 | 87  | 255 | 6  | 242 | 2 |
| 26                           | 0.62595 | 0.0527 | 0.0010 | 0.2861 | 0.0059 | 0.0393 | 0.0004 | 317 | 43  | 255 | 5  | 248 | 2 |
| 27                           | 0.75018 | 0.0540 | 0.0016 | 0.2900 | 0.0065 | 0.0386 | 0.0004 | 370 | 66  | 259 | 5  | 244 | 3 |
| <i>Monzodiorite</i> (NP13-5) |         |        |        |        |        |        |        |     |     |     |    |     |   |
| 01                           | 0.49680 | 0.0511 | 0.0013 | 0.2776 | 0.0069 | 0.0395 | 0.0004 | 244 | 57  | 249 | 5  | 250 | 3 |
| 02                           | 0.56128 | 0.0505 | 0.0014 | 0.2688 | 0.0077 | 0.0386 | 0.0004 | 218 | 62  | 242 | 6  | 244 | 3 |
| 03                           | 0.79018 | 0.0525 | 0.0012 | 0.2743 | 0.0063 | 0.0379 | 0.0004 | 308 | 51  | 246 | 5  | 240 | 2 |
| 04                           | 0.76192 | 0.0529 | 0.0022 | 0.2776 | 0.0078 | 0.0382 | 0.0005 | 326 | 94  | 249 | 6  | 241 | 3 |
| 05                           | 0.54627 | 0.0525 | 0.0013 | 0.2825 | 0.0066 | 0.0392 | 0.0004 | 306 | 55  | 253 | 5  | 248 | 2 |
| 06                           | 0.61190 | 0.0504 | 0.0010 | 0.2690 | 0.0058 | 0.0388 | 0.0004 | 215 | 48  | 242 | 5  | 245 | 3 |
| 07                           | 0.48381 | 0.0498 | 0.0015 | 0.2719 | 0.0085 | 0.0396 | 0.0004 | 186 | 70  | 244 | 7  | 250 | 3 |
| 08                           | 0.72419 | 0.0506 | 0.0014 | 0.2690 | 0.0071 | 0.0388 | 0.0004 | 225 | 65  | 242 | 6  | 245 | 2 |
| 09                           | 0.48488 | 0.0506 | 0.0011 | 0.2736 | 0.0060 | 0.0393 | 0.0003 | 223 | 51  | 246 | 5  | 248 | 2 |
| 10                           | 0.48003 | 0.0512 | 0.0014 | 0.2814 | 0.0081 | 0.0400 | 0.0005 | 252 | 63  | 252 | 6  | 253 | 3 |
| 11                           | 0.77045 | 0.0503 | 0.0008 | 0.2760 | 0.0051 | 0.0397 | 0.0004 | 211 | 37  | 247 | 4  | 251 | 2 |
| 12                           | 0.56872 | 0.0504 | 0.0023 | 0.2819 | 0.0076 | 0.0405 | 0.0005 | 214 | 107 | 252 | 6  | 256 | 3 |
| 13                           | 0.63817 | 0.0535 | 0.0010 | 0.2887 | 0.0053 | 0.0393 | 0.0004 | 348 | 44  | 258 | 4  | 248 | 2 |
| 14                           | 0.69621 | 0.0511 | 0.0010 | 0.2693 | 0.0047 | 0.0383 | 0.0003 | 244 | 43  | 242 | 4  | 243 | 2 |
| 15                           | 0.72820 | 0.0504 | 0.0011 | 0.2762 | 0.0061 | 0.0398 | 0.0004 | 215 | 49  | 248 | 5  | 251 | 3 |
| 16                           | 0.58199 | 0.0517 | 0.0016 | 0.2829 | 0.0065 | 0.0399 | 0.0005 | 271 | 72  | 253 | 5  | 252 | 3 |
| 17                           | 0.79481 | 0.0521 | 0.0021 | 0.2798 | 0.0107 | 0.0393 | 0.0006 | 289 | 91  | 250 | 8  | 249 | 4 |
| 18                           | 0.74635 | 0.0514 | 0.0010 | 0.2678 | 0.0051 | 0.0378 | 0.0003 | 259 | 45  | 241 | 4  | 239 | 2 |
| 19                           | 0.44898 | 0.0533 | 0.0029 | 0.2891 | 0.0158 | 0.0400 | 0.0012 | 343 | 124 | 258 | 12 | 253 | 8 |
| 20                           | 0.67685 | 0.0509 | 0.0010 | 0.2823 | 0.0050 | 0.0403 | 0.0003 | 238 | 43  | 252 | 4  | 254 | 2 |
| 21                           | 0.49959 | 0.0513 | 0.0014 | 0.2785 | 0.0074 | 0.0394 | 0.0004 | 255 | 61  | 249 | 6  | 249 | 2 |
| 22                           | 0.33540 | 0.0532 | 0.0010 | 0.2863 | 0.0053 | 0.0391 | 0.0003 | 336 | 44  | 256 | 4  | 247 | 2 |
| 23                           | 1.02647 | 0.0515 | 0.0011 | 0.2715 | 0.0053 | 0.0383 | 0.0004 | 262 | 47  | 244 | 4  | 242 | 2 |
| 24                           | 0.71351 | 0.0514 | 0.0012 | 0.2689 | 0.0062 | 0.0380 | 0.0004 | 257 | 53  | 242 | 5  | 241 | 2 |

*Granodiorite* (NP23-1)

|    |         |        |        |        |        |        |        |     |    |     |   |     |   |
|----|---------|--------|--------|--------|--------|--------|--------|-----|----|-----|---|-----|---|
| 01 | 0.66375 | 0.0503 | 0.0012 | 0.2700 | 0.0063 | 0.0389 | 0.0004 | 209 | 54 | 243 | 5 | 246 | 2 |
| 02 | 0.52301 | 0.0512 | 0.0013 | 0.2783 | 0.0071 | 0.0396 | 0.0004 | 251 | 60 | 249 | 6 | 250 | 3 |
| 03 | 0.73390 | 0.0498 | 0.0014 | 0.2679 | 0.0074 | 0.0392 | 0.0005 | 184 | 65 | 241 | 6 | 248 | 3 |
| 04 | 0.63123 | 0.0535 | 0.0015 | 0.2926 | 0.0082 | 0.0397 | 0.0004 | 351 | 63 | 261 | 6 | 251 | 3 |
| 05 | 0.61526 | 0.0536 | 0.0011 | 0.2906 | 0.0060 | 0.0394 | 0.0005 | 354 | 46 | 259 | 5 | 249 | 3 |
| 06 | 0.74428 | 0.0534 | 0.0012 | 0.2888 | 0.0077 | 0.0393 | 0.0005 | 344 | 52 | 258 | 6 | 248 | 3 |
| 07 | 1.06644 | 0.0536 | 0.0010 | 0.2895 | 0.0052 | 0.0393 | 0.0003 | 353 | 42 | 258 | 4 | 248 | 2 |
| 08 | 0.45688 | 0.0529 | 0.0022 | 0.2821 | 0.0073 | 0.0386 | 0.0004 | 323 | 94 | 252 | 6 | 244 | 2 |
| 09 | 0.88676 | 0.0535 | 0.0021 | 0.2910 | 0.0101 | 0.0397 | 0.0006 | 351 | 89 | 259 | 8 | 251 | 4 |
| 10 | 0.45234 | 0.0511 | 0.0012 | 0.2769 | 0.0065 | 0.0396 | 0.0004 | 243 | 54 | 248 | 5 | 250 | 3 |
| 11 | 0.78542 | 0.0534 | 0.0012 | 0.2877 | 0.0064 | 0.0392 | 0.0004 | 345 | 51 | 257 | 5 | 248 | 2 |
| 12 | 0.78403 | 0.0510 | 0.0010 | 0.2744 | 0.0053 | 0.0393 | 0.0004 | 239 | 46 | 246 | 4 | 248 | 2 |
| 13 | 0.63545 | 0.0504 | 0.0015 | 0.2700 | 0.0083 | 0.0389 | 0.0004 | 213 | 68 | 243 | 7 | 246 | 2 |
| 14 | 0.78183 | 0.0517 | 0.0013 | 0.2753 | 0.0071 | 0.0388 | 0.0004 | 270 | 58 | 247 | 6 | 245 | 3 |
| 15 | 0.70953 | 0.0527 | 0.0013 | 0.2872 | 0.0074 | 0.0397 | 0.0005 | 316 | 57 | 256 | 6 | 251 | 3 |
| 16 | 0.63481 | 0.0502 | 0.0012 | 0.2687 | 0.0065 | 0.0389 | 0.0004 | 203 | 54 | 242 | 5 | 246 | 2 |
| 17 | 0.64032 | 0.0515 | 0.0016 | 0.2816 | 0.0085 | 0.0398 | 0.0004 | 264 | 71 | 252 | 7 | 252 | 3 |
| 18 | 0.74090 | 0.0519 | 0.0013 | 0.2759 | 0.0064 | 0.0388 | 0.0004 | 282 | 56 | 247 | 5 | 245 | 3 |
| 19 | 0.90933 | 0.0500 | 0.0011 | 0.2687 | 0.0059 | 0.0391 | 0.0003 | 196 | 52 | 242 | 5 | 247 | 2 |
| 20 | 0.89017 | 0.0516 | 0.0014 | 0.2765 | 0.0072 | 0.0391 | 0.0005 | 266 | 63 | 248 | 6 | 247 | 3 |
| 21 | 0.80878 | 0.0525 | 0.0014 | 0.2845 | 0.0075 | 0.0394 | 0.0004 | 309 | 60 | 254 | 6 | 249 | 2 |
| 22 | 0.54631 | 0.0503 | 0.0010 | 0.2701 | 0.0059 | 0.0389 | 0.0003 | 210 | 48 | 243 | 5 | 246 | 2 |
| 23 | 0.70287 | 0.0530 | 0.0010 | 0.2849 | 0.0054 | 0.0391 | 0.0003 | 327 | 44 | 255 | 4 | 247 | 2 |
| 24 | 0.99506 | 0.0508 | 0.0009 | 0.2767 | 0.0051 | 0.0395 | 0.0004 | 231 | 40 | 248 | 4 | 250 | 2 |

---

Table S3. Lu-Hf isotope data for zircons.

| Analysis spot                | t (Ma) | $\frac{^{176}\text{Yb}}{^{177}\text{Hf}}$ | $\frac{^{176}\text{Lu}}{^{177}\text{Hf}}$ | $\frac{^{176}\text{Hf}}{^{177}\text{Hf}}$ | $\epsilon_{\text{Hf}}(0)$ | 2 $\sigma$ | $\epsilon_{\text{Hf}}(t)$ | 2 $\sigma$ | T <sub>DM1</sub> | T <sub>DM2</sub> | f <sub>Lu/Hf</sub> |
|------------------------------|--------|-------------------------------------------|-------------------------------------------|-------------------------------------------|---------------------------|------------|---------------------------|------------|------------------|------------------|--------------------|
| <i>Diorite</i> (NP01-2)      |        |                                           |                                           |                                           |                           |            |                           |            |                  |                  |                    |
| 01                           | 252    | 0.043900                                  | 0.001663                                  | 0.282907                                  | 4.8                       | 0.746452   | 10.0                      | 0.8        | 497              | 636              | -0.95              |
| 02                           | 254    | 0.045012                                  | 0.001621                                  | 0.282956                                  | 6.5                       | 0.835497   | 11.8                      | 0.9        | 426              | 524              | -0.95              |
| 03                           | 246    | 0.053951                                  | 0.002768                                  | 0.282948                                  | 6.2                       | 1.409975   | 11.2                      | 1.4        | 452              | 558              | -0.92              |
| 04                           | 257    | 0.047464                                  | 0.002039                                  | 0.282870                                  | 3.5                       | 0.953410   | 8.8                       | 1.0        | 557              | 720              | -0.94              |
| 05                           | 250    | 0.039610                                  | 0.001869                                  | 0.282963                                  | 6.8                       | 1.888189   | 12.0                      | 1.9        | 419              | 513              | -0.94              |
| 06                           | 252    | 0.043006                                  | 0.001567                                  | 0.282874                                  | 3.6                       | 0.733269   | 8.9                       | 0.7        | 545              | 711              | -0.95              |
| 07                           | 189    | 0.054959                                  | 0.002517                                  | 0.282925                                  | 5.4                       | 1.121832   | 9.2                       | 1.1        | 484              | 639              | -0.92              |
| 08                           | 248    | 0.044499                                  | 0.001867                                  | 0.282898                                  | 4.5                       | 0.812937   | 9.6                       | 0.8        | 514              | 661              | -0.94              |
| 09                           | 250    | 0.050372                                  | 0.001635                                  | 0.282897                                  | 4.4                       | 0.672667   | 9.7                       | 0.7        | 511              | 658              | -0.95              |
| 10                           | 225    | 0.046493                                  | 0.002140                                  | 0.282967                                  | 6.9                       | 1.066276   | 11.5                      | 1.1        | 416              | 519              | -0.94              |
| 11                           | 252    | 0.053117                                  | 0.002179                                  | 0.282899                                  | 4.5                       | 1.004313   | 9.7                       | 1.0        | 516              | 660              | -0.93              |
| 12                           | 251    | 0.032704                                  | 0.000974                                  | 0.282902                                  | 4.6                       | 0.870787   | 9.9                       | 0.9        | 496              | 641              | -0.97              |
| 13                           | 253    | 0.056103                                  | 0.001851                                  | 0.282875                                  | 3.6                       | 0.821551   | 8.9                       | 0.8        | 547              | 710              | -0.94              |
| 14                           | 249    | 0.074926                                  | 0.002411                                  | 0.282890                                  | 4.2                       | 0.787483   | 9.3                       | 0.8        | 533              | 684              | -0.93              |
| 15                           | 256    | 0.051650                                  | 0.001897                                  | 0.282882                                  | 3.9                       | 0.966818   | 9.2                       | 1.0        | 538              | 693              | -0.94              |
| 16                           | 255    | 0.045160                                  | 0.001632                                  | 0.282939                                  | 5.9                       | 0.883436   | 11.2                      | 0.9        | 452              | 563              | -0.95              |
| 17                           | 250    | 0.051819                                  | 0.002378                                  | 0.282947                                  | 6.2                       | 1.027560   | 11.3                      | 1.0        | 448              | 554              | -0.93              |
| 18                           | 242    | 0.055763                                  | 0.002145                                  | 0.282962                                  | 6.7                       | 0.984587   | 11.7                      | 1.0        | 424              | 522              | -0.94              |
| 19                           | 207    | 0.038682                                  | 0.001926                                  | 0.282908                                  | 4.8                       | 1.000972   | 9.1                       | 1.0        | 500              | 662              | -0.94              |
| 20                           | 259    | 0.035515                                  | 0.001305                                  | 0.282916                                  | 5.1                       | 0.738948   | 10.6                      | 0.8        | 480              | 607              | -0.96              |
| 21                           | 254    | 0.075916                                  | 0.002296                                  | 0.282916                                  | 5.1                       | 0.888701   | 10.3                      | 0.9        | 493              | 621              | -0.93              |
| 22                           | 224    | 0.051354                                  | 0.002123                                  | 0.282876                                  | 3.7                       | 0.990197   | 8.3                       | 1.0        | 549              | 726              | -0.94              |
| 23                           | 244    | 0.057713                                  | 0.002274                                  | 0.282910                                  | 4.9                       | 0.980311   | 9.9                       | 1.0        | 501              | 640              | -0.93              |
| 24                           | 241    | 0.030993                                  | 0.002706                                  | 0.282938                                  | 5.9                       | 0.889455   | 10.7                      | 0.9        | 466              | 583              | -0.92              |
| 25                           | 242    | 0.048549                                  | 0.001950                                  | 0.282917                                  | 5.1                       | 0.791250   | 10.1                      | 0.8        | 487              | 622              | -0.94              |
| 26                           | 248    | 0.038373                                  | 0.001503                                  | 0.282950                                  | 6.3                       | 0.854266   | 11.5                      | 0.9        | 434              | 540              | -0.95              |
| 27                           | 244    | 0.054563                                  | 0.002034                                  | 0.282884                                  | 4.0                       | 1.094661   | 9.0                       | 1.1        | 536              | 697              | -0.94              |
| <i>Monzodiorite</i> (NP13-5) |        |                                           |                                           |                                           |                           |            |                           |            |                  |                  |                    |
| 01                           | 250    | 0.022272                                  | 0.000718                                  | 0.282811                                  | 1.4                       | 0.918567   | 6.7                       | 0.9        | 621              | 845              | -0.98              |
| 02                           | 244    | 0.036227                                  | 0.001158                                  | 0.282827                                  | 2.0                       | 0.982182   | 7.1                       | 1.0        | 604              | 815              | -0.97              |
| 03                           | 240    | 0.036591                                  | 0.001272                                  | 0.282899                                  | 4.5                       | 1.105801   | 9.6                       | 1.1        | 504              | 657              | -0.96              |
| 04                           | 241    | 0.042757                                  | 0.001593                                  | 0.282899                                  | 4.5                       | 1.015218   | 9.6                       | 1.0        | 508              | 658              | -0.95              |
| 05                           | 248    | 0.037045                                  | 0.001213                                  | 0.282870                                  | 3.5                       | 1.077009   | 8.7                       | 1.1        | 545              | 717              | -0.96              |
| 06                           | 245    | 0.034967                                  | 0.001129                                  | 0.282837                                  | 2.3                       | 0.990439   | 7.5                       | 1.0        | 590              | 793              | -0.97              |
| 07                           | 250    | 0.029295                                  | 0.001078                                  | 0.282848                                  | 2.7                       | 0.714695   | 8.0                       | 0.7        | 575              | 765              | -0.97              |
| 08                           | 245    | 0.037566                                  | 0.001112                                  | 0.282840                                  | 2.4                       | 0.867624   | 7.6                       | 0.9        | 585              | 785              | -0.97              |
| 09                           | 248    | 0.030294                                  | 0.000974                                  | 0.282884                                  | 4.0                       | 0.886811   | 9.3                       | 0.9        | 521              | 683              | -0.97              |
| 10                           | 253    | 0.041935                                  | 0.001413                                  | 0.282889                                  | 4.1                       | 0.795526   | 9.5                       | 0.8        | 520              | 674              | -0.96              |
| 11                           | 251    | 0.045425                                  | 0.001492                                  | 0.282909                                  | 4.9                       | 0.951456   | 10.1                      | 1.0        | 492              | 629              | -0.96              |
| 12                           | 256    | 0.022438                                  | 0.000789                                  | 0.282834                                  | 2.2                       | 1.011146   | 7.7                       | 1.0        | 589              | 789              | -0.98              |
| 13                           | 248    | 0.035858                                  | 0.001154                                  | 0.282857                                  | 3.0                       | 1.042945   | 8.3                       | 1.0        | 562              | 745              | -0.97              |
| 14                           | 243    | 0.044976                                  | 0.001389                                  | 0.282854                                  | 2.9                       | 0.999734   | 8.0                       | 1.0        | 570              | 758              | -0.96              |
| 15                           | 251    | 0.045266                                  | 0.001253                                  | 0.282867                                  | 3.4                       | 0.990197   | 8.7                       | 1.0        | 549              | 722              | -0.96              |
| 16                           | 252    | 0.032340                                  | 0.001214                                  | 0.282923                                  | 5.3                       | 0.965465   | 10.7                      | 1.0        | 469              | 595              | -0.96              |

|                              |     |          |          |          |     |          |      |     |     |     |       |
|------------------------------|-----|----------|----------|----------|-----|----------|------|-----|-----|-----|-------|
| 17                           | 249 | 0.043829 | 0.001229 | 0.282836 | 2.2 | 0.819294 | 7.5  | 0.8 | 594 | 795 | -0.96 |
| 18                           | 239 | 0.046327 | 0.001421 | 0.282937 | 5.8 | 1.025242 | 10.9 | 1.0 | 452 | 573 | -0.96 |
| 19                           | 253 | 0.031601 | 0.001027 | 0.282882 | 3.9 | 0.834197 | 9.3  | 0.9 | 525 | 685 | -0.97 |
| 20                           | 254 | 0.025146 | 0.000833 | 0.282920 | 5.2 | 0.972555 | 10.7 | 1.0 | 469 | 597 | -0.97 |
| 21                           | 249 | 0.026391 | 0.000849 | 0.282905 | 4.7 | 1.006589 | 10.0 | 1.0 | 490 | 634 | -0.97 |
| 22                           | 247 | 0.040188 | 0.001390 | 0.282887 | 4.1 | 1.124456 | 9.3  | 1.1 | 523 | 682 | -0.96 |
| 23                           | 242 | 0.036186 | 0.001101 | 0.282876 | 3.7 | 0.959744 | 8.8  | 1.0 | 535 | 707 | -0.97 |
| 24                           | 241 | 0.035339 | 0.001100 | 0.282859 | 3.1 | 1.013013 | 8.2  | 1.0 | 559 | 746 | -0.97 |
| <i>Granodiorite (NP23-1)</i> |     |          |          |          |     |          |      |     |     |     |       |
| 01                           | 246 | 0.052576 | 0.001554 | 0.282816 | 1.6 | 0.924016 | 6.7  | 0.9 | 627 | 843 | -0.95 |
| 02                           | 250 | 0.033503 | 0.001014 | 0.282854 | 2.9 | 0.910312 | 8.2  | 0.9 | 564 | 750 | -0.97 |
| 03                           | 248 | 0.039676 | 0.001435 | 0.282882 | 3.9 | 1.047285 | 9.1  | 1.1 | 530 | 691 | -0.96 |
| 04                           | 251 | 0.043785 | 0.001288 | 0.282854 | 2.9 | 1.043259 | 8.2  | 1.1 | 568 | 752 | -0.96 |
| 05                           | 249 | 0.050882 | 0.001863 | 0.282902 | 4.6 | 1.047944 | 9.8  | 1.1 | 508 | 652 | -0.94 |
| 06                           | 248 | 0.025683 | 0.000811 | 0.282857 | 3.0 | 0.835148 | 8.3  | 0.8 | 557 | 742 | -0.98 |
| 07                           | 248 | 0.053238 | 0.001640 | 0.282897 | 4.4 | 0.918558 | 9.6  | 0.9 | 511 | 660 | -0.95 |
| 08                           | 244 | 0.043201 | 0.001689 | 0.282954 | 6.4 | 1.198736 | 11.5 | 1.2 | 430 | 535 | -0.95 |
| 09                           | 251 | 0.030686 | 0.001009 | 0.282886 | 4.0 | 0.680825 | 9.4  | 0.7 | 519 | 678 | -0.97 |
| 10                           | 250 | 0.024337 | 0.000841 | 0.282837 | 2.3 | 0.855560 | 7.7  | 0.9 | 585 | 786 | -0.97 |
| 11                           | 248 | 0.035297 | 0.001045 | 0.282862 | 3.2 | 1.032675 | 8.5  | 1.0 | 553 | 734 | -0.97 |
| 12                           | 248 | 0.040652 | 0.001146 | 0.282903 | 4.6 | 0.995400 | 9.9  | 1.0 | 496 | 641 | -0.97 |
| 13                           | 246 | 0.047544 | 0.001407 | 0.282886 | 4.0 | 1.048465 | 9.2  | 1.1 | 525 | 684 | -0.96 |
| 14                           | 245 | 0.063280 | 0.001697 | 0.282928 | 5.5 | 1.049757 | 10.6 | 1.1 | 468 | 594 | -0.95 |
| 15                           | 251 | 0.060817 | 0.001725 | 0.282909 | 4.8 | 1.125686 | 10.1 | 1.1 | 496 | 633 | -0.95 |
| 16                           | 246 | 0.044274 | 0.001337 | 0.282919 | 5.2 | 0.993720 | 10.4 | 1.0 | 476 | 608 | -0.96 |
| 17                           | 252 | 0.072742 | 0.002166 | 0.282898 | 4.5 | 1.219687 | 9.6  | 1.2 | 518 | 662 | -0.93 |
| 18                           | 245 | 0.052564 | 0.001586 | 0.282906 | 4.8 | 0.990810 | 9.9  | 1.0 | 498 | 641 | -0.95 |
| 19                           | 247 | 0.040203 | 0.001188 | 0.282878 | 3.8 | 1.118253 | 9.0  | 1.1 | 532 | 699 | -0.96 |
| 20                           | 247 | 0.047258 | 0.001344 | 0.282962 | 6.7 | 0.850973 | 11.9 | 0.9 | 415 | 512 | -0.96 |
| 21                           | 249 | 0.033083 | 0.000971 | 0.282873 | 3.6 | 0.951993 | 8.9  | 1.0 | 537 | 708 | -0.97 |
| 22                           | 246 | 0.052816 | 0.001528 | 0.282861 | 3.2 | 0.962200 | 8.3  | 1.0 | 562 | 741 | -0.95 |
| 23                           | 247 | 0.072802 | 0.002153 | 0.282868 | 3.4 | 1.120853 | 8.5  | 1.1 | 562 | 733 | -0.94 |
| 24                           | 250 | 0.046000 | 0.001316 | 0.282925 | 5.4 | 1.007265 | 10.7 | 1.0 | 467 | 593 | -0.96 |
